# Supplementary material for: Leveraging metatranscriptomics for the characterisation of bovine blood viromes
Source: Research Square preprint supplement (doi:10.21203/rs.3.rs-7082258/v1), 2025-08-08
Supplement: Supplementary file 1 [file 9fd7dcd0606cbf901d1b9762.pdf]

## **Leveraging metatranscriptomics for the characterisation of bovine blood viromes**

Barbara Brito<sup>1,2</sup>, Matthew DeMaere<sup>2</sup>, Ian Lean<sup>3</sup>, Mark Hazelton<sup>1</sup>, Brendon A O'Rourke<sup>1</sup>, Edward C Holmes<sup>4</sup>,  
John K House<sup>5</sup>, Sam Rowe<sup>5</sup>, Garry Myers<sup>2</sup> and Piklu Roy Chowdhury<sup>2</sup>.

<sup>1</sup> New South Wales Department of Primary Industries and Regional Development (DPIRD), Elizabeth  
Macarthur Agricultural Institute, Menangle, NSW, Australia

<sup>2</sup> Australian Institute for Microbiology and Infection, University of Technology Sydney, Ultimo, NSW, Australia

<sup>3</sup> Scibus, Camden, NSW 2570, Australia

<sup>4</sup> School of Medical Sciences, The University of Sydney, New South Wales, Australia.

<sup>5</sup> Faculty of Science, Sydney School of Veterinary Science, The University of Sydney, Camden, New South  
Wales 2570, Australia.

Table S1- Sample processing of published sequences:

| Bioproject                                               | Title                                                                                                             | Animal and collection                                                       | Sample processing                                                                                                                                                           | Extraction                             | Library Preparation                                            | Sequencing                                                                                            |
|----------------------------------------------------------|-------------------------------------------------------------------------------------------------------------------|-----------------------------------------------------------------------------|-----------------------------------------------------------------------------------------------------------------------------------------------------------------------------|----------------------------------------|----------------------------------------------------------------|-------------------------------------------------------------------------------------------------------|
| PRJNA616134                                              | Gene expression of the heat stress response in bovine peripheral white blood cells and milk somatic cells in vivo | Data from 12 non-pregnant multiparous Holstein Fresian cows                 | Centrifuged at 4C, fractionation and WBC stabilization- stored in RNAlater                                                                                                  | RiboPuer Blood Kit (Ambion)            | SureSelect Strand Specific RNA Library Prep Kit (Agilent) mRNA | HiSeq 3000 (Illumina Inc) in a 150-cycle paired-end run                                               |
| PRJNA616134<br>PRJNA917329<br>PRJNA305942<br>PRJNA392196 | Gene expression and RNA splicing explain large proportions of the heritability for complex traits in cattle       | 382 lactating (Holstein and Jersey)                                         | Centrifuged at 4C, fractionation and WBC stabilization- stored in RNAlater                                                                                                  | RiboPuer Blood Kit (Ambion)            | SureSelect Strand Specific RNA Library Prep Kit (Agilent) mRNA | HiSeq3000 (Illumina Inc) or NovaSeq6000 (Illumina Inc) genome analyzer in a paired-end, 150-cycle run |
| PRJEB44244                                               | Longitudinal study of blood-derived transcriptomes of Boran cattle naturally exposed to Theileria parva           | 30 Boran cattle from the Kapiti research station in Machakos county, Kenya. | Tubes were then centrifuged at 300 g for 5 min at RT and the supernatant discarded. The pellet was rinsed twice with 15 ml of PBS + centrifuged, resuspended in tri-reagent | RNA was extracted by phenol chloroform | TruSeq Stranded mRNA                                           | Illumina HiSeq                                                                                        |

Supplementary table S2: Data output analysed after QC trimming per library. Total RNA sequencing from blood samples of cows with and without mastitis. Twenty out of 70 samples that had a DV>200 were sequenced (BioProject: PRJNA1250162).

| Library | Reads after QC (%) |          | Bases after QC (%) |          | Status      | BioSamples   |
|---------|--------------------|----------|--------------------|----------|-------------|--------------|
| BM_06   | 126334140          | (99.93%) | 18069685232        | (95.29%) | Mastitis    | SAMN47932226 |
| BM_11   | 128869756          | (99.96%) | 18290493384        | (94.58%) | Mastitis    | SAMN47932227 |
| BM_12   | 103141786          | (99.93%) | 14297261968        | (92.34%) | Mastitis    | SAMN47932228 |
| BM_13   | 125288824          | (99.97%) | 17654855197        | (93.91%) | Mastitis    | SAMN47932229 |
| BM_17   | 138282820          | (99.95%) | 19607916235        | (94.48%) | Mastitis    | SAMN47932230 |
| BM_19   | 151804270          | (99.94%) | 21393920325        | (93.9%)  | Mastitis    | SAMN47932231 |
| BM_22   | 111685978          | (99.95%) | 15938154735        | (95.09%) | Mastitis    | SAMN47932232 |
| BM_26   | 116405556          | (99.96%) | 16316066744        | (93.41%) | Mastitis    | SAMN47932233 |
| BM_27   | 139875272          | (99.92%) | 19504005367        | (92.88%) | Mastitis    | SAMN47932234 |
| BM_28   | 162814936          | (99.93%) | 23002170333        | (94.12%) | Mastitis    | SAMN47932235 |
| BM_29   | 107102218          | (99.66%) | 14624550324        | (90.72%) | Mastitis    | SAMN47932236 |
| BM_35   | 120298186          | (99.94%) | 17136193810        | (94.91%) | Mastitis    | SAMN47932237 |
| BM_37   | 99991674           | (99.9%)  | 14038189285        | (93.5%)  | No Mastitis | SAMN47932238 |
| BM_41   | 126270368          | (99.96%) | 17878307544        | (94.35%) | No Mastitis | SAMN47932239 |
| BM_49   | 124919934          | (99.97%) | 17828271943        | (95.12%) | No Mastitis | SAMN47932240 |
| BM_60   | 133608282          | (99.97%) | 18991419907        | (94.73%) | No Mastitis | SAMN47932241 |
| BM_64   | 162893752          | (99.92%) | 23187865410        | (94.82%) | No Mastitis | SAMN47932242 |
| BM_67   | 127349912          | (99.95%) | 18098611703        | (94.7%)  | No Mastitis | SAMN47932243 |
| BM_68   | 130867296          | (99.95%) | 18561407149        | (94.51%) | No Mastitis | SAMN47932244 |
| BM_69   | 128629238          | (99.93%) | 18353711613        | (95.05%) | No Mastitis | SAMN47932245 |
